# Supplementary material for: Inverse control of Rab proteins by Yersinia ADP-ribosyltransferase and glycosyltransferase related to clostridial glucosylating toxins
Source: PubMed Central journal article supplement — Sci Adv. 2020 Mar 11;6(11):eaaz2094. doi: 10.1126/sciadv.aaz2094 (PMC7065874; doi:10.1126/sciadv.aaz2094), 2020-03-11
Supplement: aaz2094_SM.pdf [file aaz2094_SM.pdf]

## Supplementary Materials for

### **Inverse control of Rab proteins by *Yersinia* ADP-ribosyltransferase and glycosyltransferase related to clostridial glucosylating toxins**

G. Stefan Ost, Christophe Wirth, Xenia Bogdanović, Wei-Chun Kao, Björn Schorch, Philipp J. K. Aktories, Panagiotis Papatheodorou, Carsten Schwan, Andreas Schlosser, Thomas Jank, Carola Hunte, Klaus Aktories\*

\*Corresponding author. Email: klaus.aktories@pharmakol.uni-freiburg.de

Published 11 March 2020, *Sci. Adv.* **6**, eaaz2094 (2020)  
DOI: 10.1126/sciadv.aaz2094

#### **This PDF file includes:**

Fig. S1. Model of the domain architecture of YART and YGT, in comparison to *C. difficile* TcdB and *C. perfringens* TpeL.

Fig. S2. Processing, expression, and enzyme activity of YART and YGT.

Fig. S3. Topological representation of YGT<sup>G</sup> and potassium ion coordination in the ligand-bound YGT<sup>G</sup> structure.

Fig. S4. C-terminal loop of the glycosyltransferase domain encloses the nucleotide-binding site in the UDP-bound state and leaves it open in the ligand-free state.

Fig. S5. ETD MS/MS spectra.

Fig. S6. YART- and YGT-induced modifications of Rab31.

Table S1. Data collection and refinement statistics.

Table S2. Proteins structurally homologous to YGT<sup>G</sup> as identified by DALI and showing a Z score higher than 10.

Table S3. Genomic DNA, primer, gblocks, plasmids, and vectors.

Table S4. Buffer and conditions of protein purification.

## Supplementary Materials

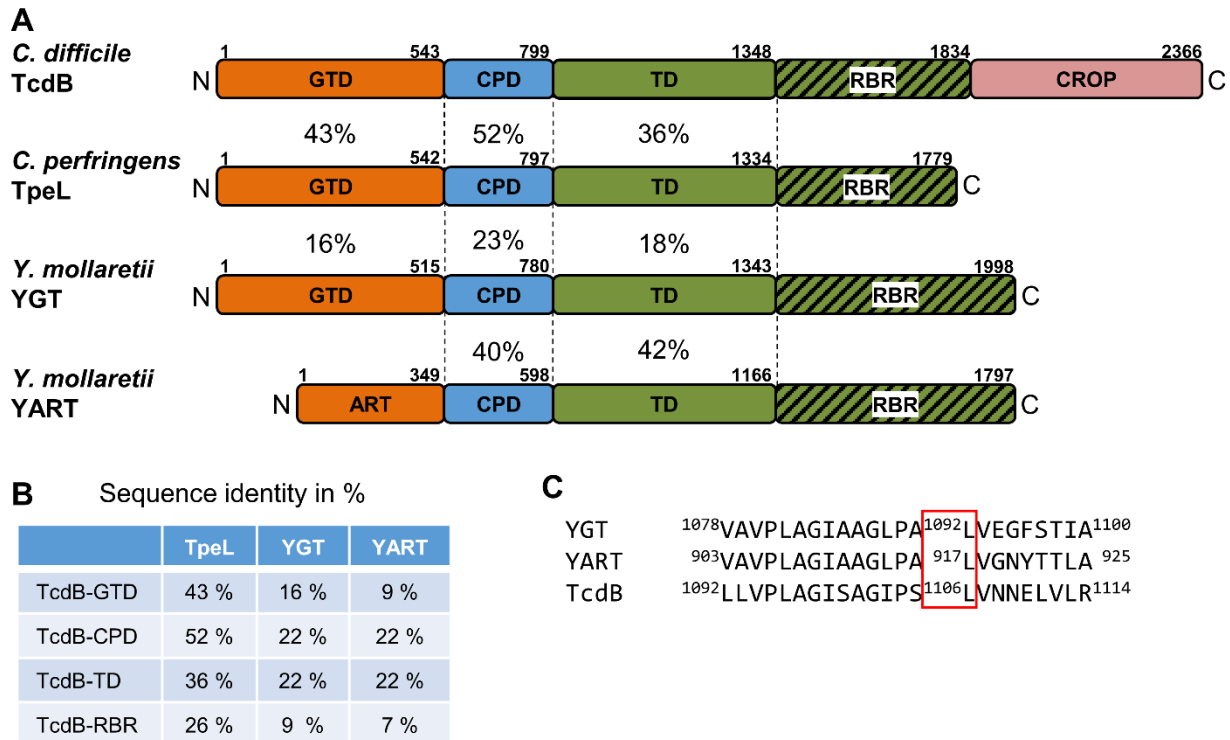

**Fig. S1. Model of the domain architecture of YART and YGT, in comparison to *C. difficile* TcdB and *C. perfringens* TpeL.** (A) Sequence alignments suggest an ADP-ribosyltransferase-(ART) and a glucosyltransferase domain (GTD) at the N-terminus of *Y. mollaretii* YART and YGT, respectively. It follows a cysteine protease domain (CPD), translocation domain (TD) and a receptor-binding region (RBR) within the translocation domain. The C-terminal located domain of combined repetitive oligopeptides (CROPs) is only present in TcdB but not in TpeL or YART and YGT. The amino acid sequences of the various toxin domains are compared between TcdB and TpeL, YGT and TpeL and YART and YGT. Sequence identities of domains/regions (indicated by amino acid numbers) are given in percent. (B) Sequence identities of protein domains/regions presented in (A) compared with the respective domains/regions of TcdB. (C) ClustalW alignment of TcdB, YART and YGT of a region essential for translocation. Mutation of the marked leucine residue (red box) inhibits membrane activity (see Fig. 1 B and C).

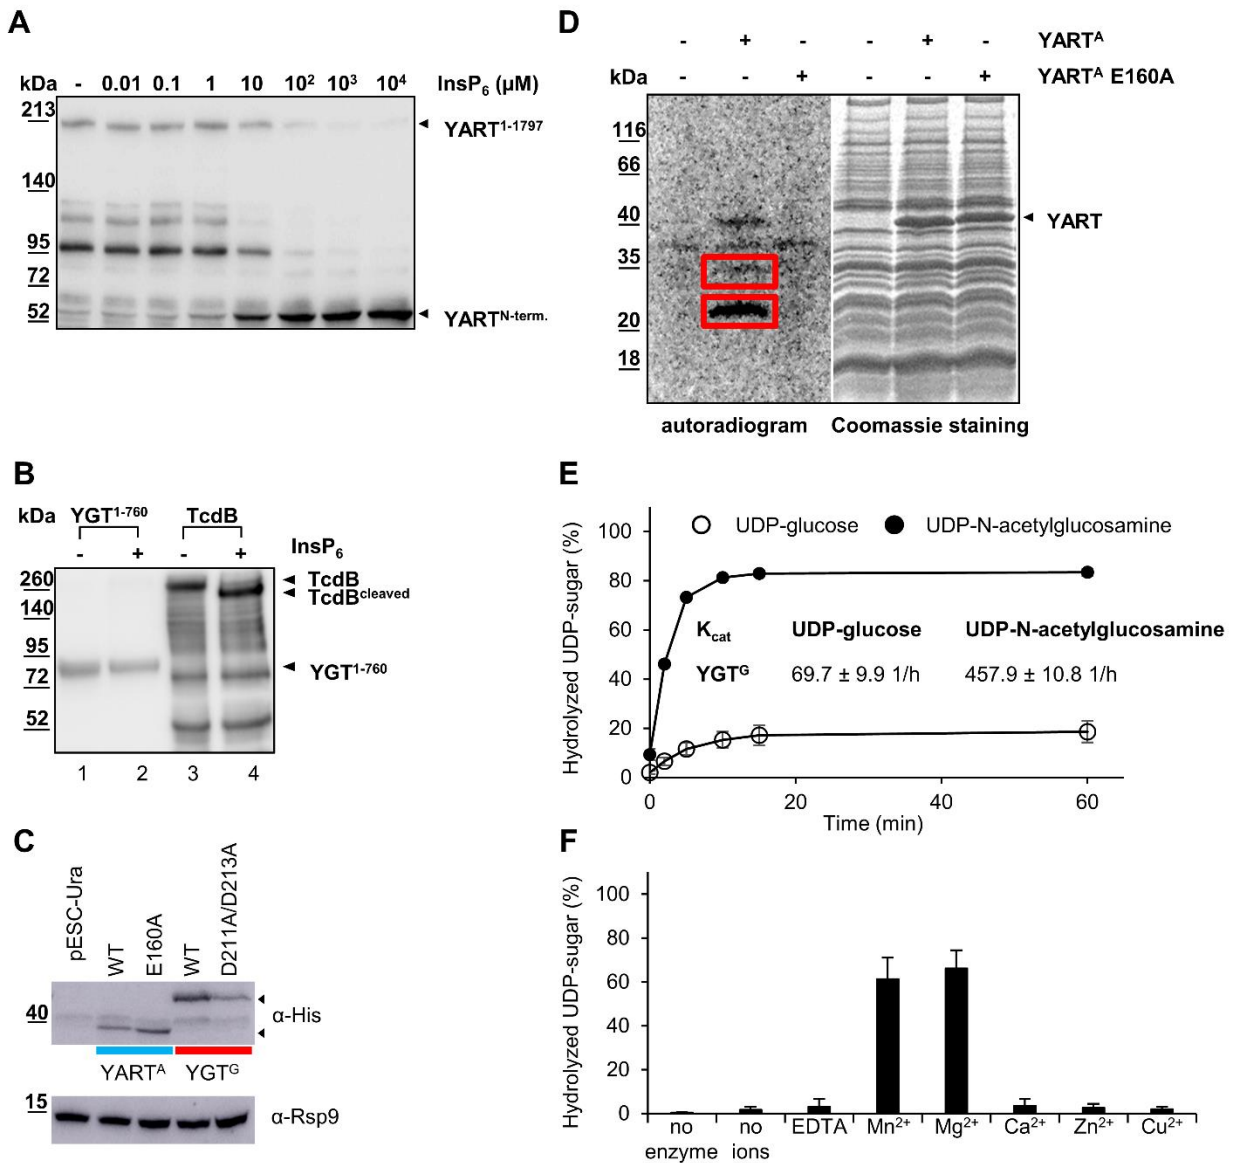

**Fig. S2. Processing, expression, and enzyme activity of YART and YGT.** (A, B) InsP<sub>6</sub>-dependent auto-catalytic cleavage of YART and YGT. (A) InsP<sub>6</sub> induced processing of YART<sup>1-1797</sup> at increasing concentrations of InsP<sub>6</sub> after incubation for 1 h at 37 °C. An ~52 kDa fragment was released (YART<sup>N-term.</sup>). The visualisation of the cleavage products was done by SDS-PAGE, Western-blot and subsequent staining with anti-His antibody. (B) YGT<sup>1-760</sup> was incubated for 1 h at 37 °C with 10 mM InsP<sub>6</sub> (lanes 1 and 2) without protein cleavage. As positive control, TcdB (1 μg, lanes 3 and 4) was treated with 10 mM InsP<sub>6</sub> for 1 h at 37 °C, resulting in TcdB cleavage (TcdB<sup>cleaved</sup>). The visualisation of the cleavage products was done as described in (A). (C) Expression of YART and YGT proteins in yeast. For examination of the expression of YART (wild type (WT) and inactive mutant E160A) and YGT (wild type (WT) and inactive mutant D211A/D213A), yeast cells were lysed after growing for 3 days under galactose conditions. As control, the empty vector (pESC-Ura) was transfected. The expression of the proteins was analyzed by SDS-PAGE, Western-blot and immunostaining with an anti-His

antibody (proteins are indicated by arrow heads). Loading control was tested with antibody against the ribosomal subunit Rsp9. **(D)** YART<sup>A</sup> ADP-ribosylates several proteins in membrane fractions of yeast. The membrane fraction of yeast lysate was incubated for 1 h at 21 °C together with YART<sup>A</sup> and [<sup>32</sup>P]NAD<sup>+</sup>. As negative control, lysate was incubated with [<sup>32</sup>P]NAD<sup>+</sup> without YART<sup>A</sup> or with the inactive mutant YART<sup>A</sup> E160A. The two additional bands that occurred after incubation with YART<sup>A</sup> are boxed in red. Shown is the phosphorimager readout together with the respective Coomassie-stained gel. **(E, F)** Glycohydrolase activity of YGT. **(E)** Identification of the preferred substrate hydrolyzed by YGT. YGT<sup>G</sup> (1.8 μM) was incubated with 110 μM UDP-[<sup>14</sup>C]Glc or UDP-[<sup>14</sup>C]GlcNAc for the indicated times. Then, samples were subjected to thin layer chromatography. Calculation of K<sub>cat</sub> values was done by using time points 0, 2, and 5 min. **(F)** Cation-dependency of hydrolase activity of YGT. UDP-[<sup>14</sup>C]GlcNAc (15 μM) was incubated with 0.5 μM YGT<sup>G</sup> in presence of different divalent cations. The reaction was performed at 21 °C in buffer containing 50 mM HEPES, 100 mM KCl and 3 mM of the indicated cations or 1 mM of EDTA. Data (+/-SD) are given from 3 independent experiments. Hydrolyzed sugars were visualized by autoradiography and the signal intensities quantified with ImageQuant.

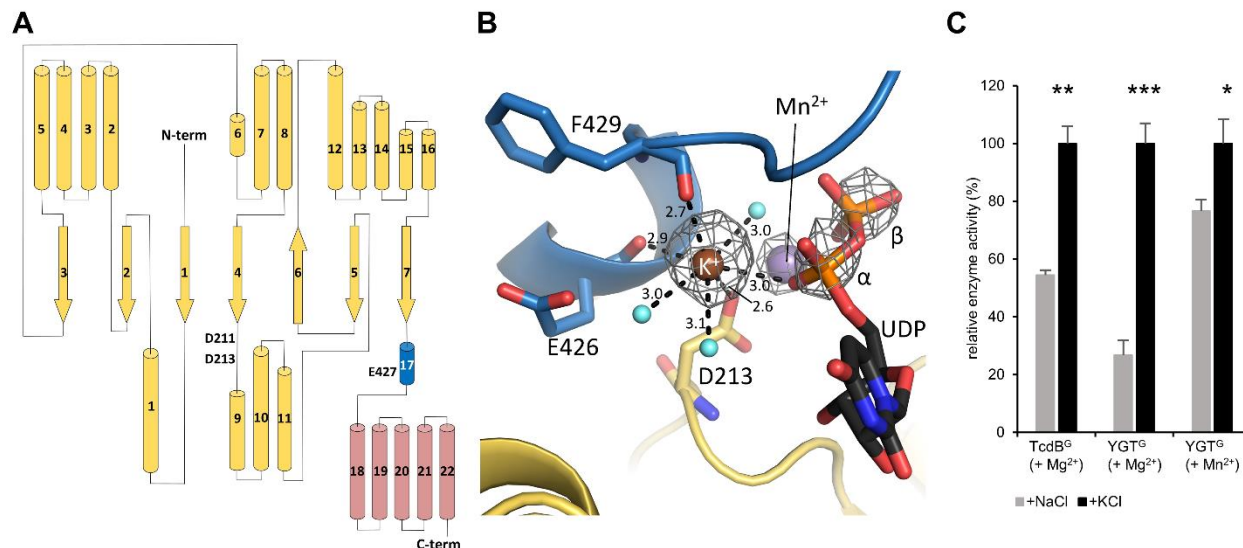

**Fig. S3. Topological representation of YGT<sup>G</sup> and potassium ion coordination in the ligand-bound YGT<sup>G</sup> structure.** (A) The core domain is represented in yellow, as in Fig. 4. The seven stranded mixed  $\beta$ -sheet is represented centrally, surrounded by the  $\alpha$ -helical structural elements. The position of the DxD motif at the end of strand 4 is indicated. Helix 17, comprising Glu427, as well as the loop covering the UDP binding site are represented in blue. The 5 helix bundle at the C-terminus of YGT<sup>G</sup> is represented in light red. (B) A strong peak in the anomalous Fourier electron density map obtained from native-SAD data (mesh presentation contoured at  $5\sigma$ ) supports presence of a potassium ion adjacent to the phosphate moieties of UDP and Mn<sup>2+</sup>. The potassium ion (brown sphere) is coordinated by main chain carbonyl groups from Glu426 of helix 17 and from Phe429 of the subsequent loop that covers the di-phosphate moiety of the nucleotide. In addition, Asp213 coordinates both K<sup>+</sup> and Mn<sup>2+</sup> via its carboxylic side chain. Further contributors to the K<sup>+</sup> coordination are water molecules and an oxygen atom from the  $\alpha$ -phosphate from UDP. (C) Cation dependency of Rab5A glycosylation by YGT<sup>G</sup> in present of Mg<sup>2+</sup> or Mn<sup>2+</sup> compared to RhoA glycosylation by TcdB<sup>G</sup> with Mg<sup>2+</sup>. Substrate proteins were separated by SDS-PAGE and analyzed by phosphorimaging. Shown are the means (+/-SD) of 3 independent experiments. Unpaired two sample t-test was used (\*,  $p < 0.05$ ; \*\*,  $p < 0.01$ ; \*\*\*,  $p < 0.001$ ).

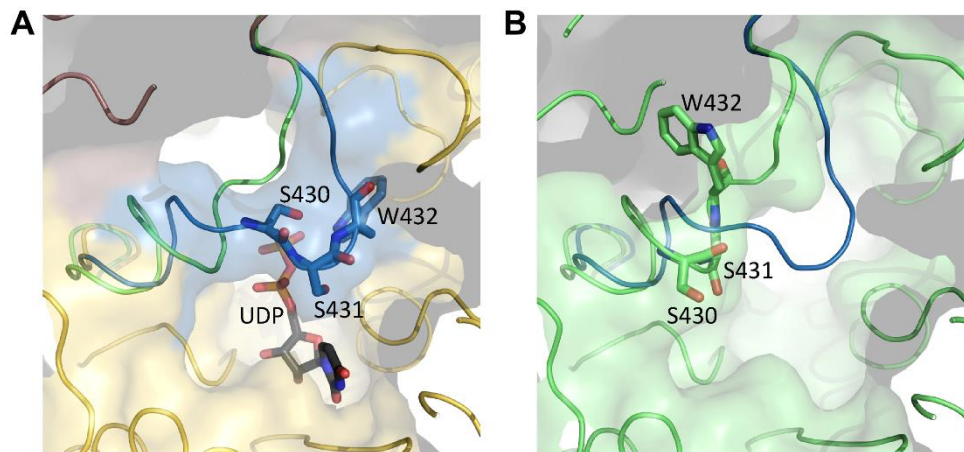

**Fig. S4. C-terminal loop of the glycosyltransferase domain encloses the nucleotide-binding site in the UDP-bound state and leaves it open in the ligand-free state.** (A) The structure of UDP-bound YGT<sup>G</sup> is displayed as ribbon and with its surface represented with colors as in Fig. 4. The UDP molecule and the diphosphate-coordinating residues within the loop are represented as sticks. The loop of the ligand-free structure is superimposed and shown as green ribbon. It is shifted towards the 5-helix bundle with a distance of 8.5 Å for the C $\alpha$ -position of Trp432. The side chain of the latter reorients away from the ligand binding site. (B) The ligand-free structure is represented as green ribbon and surface, with residues relevant for di-phosphate coordination displayed as sticks. The conformation of the loop leaves the binding pocket open. The loop is resolved in one of the YGT<sup>G</sup> protomers, and disordered in the other. For visualization of the closed conformation, the loop of the UDP-bound YGT<sup>G</sup> structure is superimposed and shown as blue ribbon.

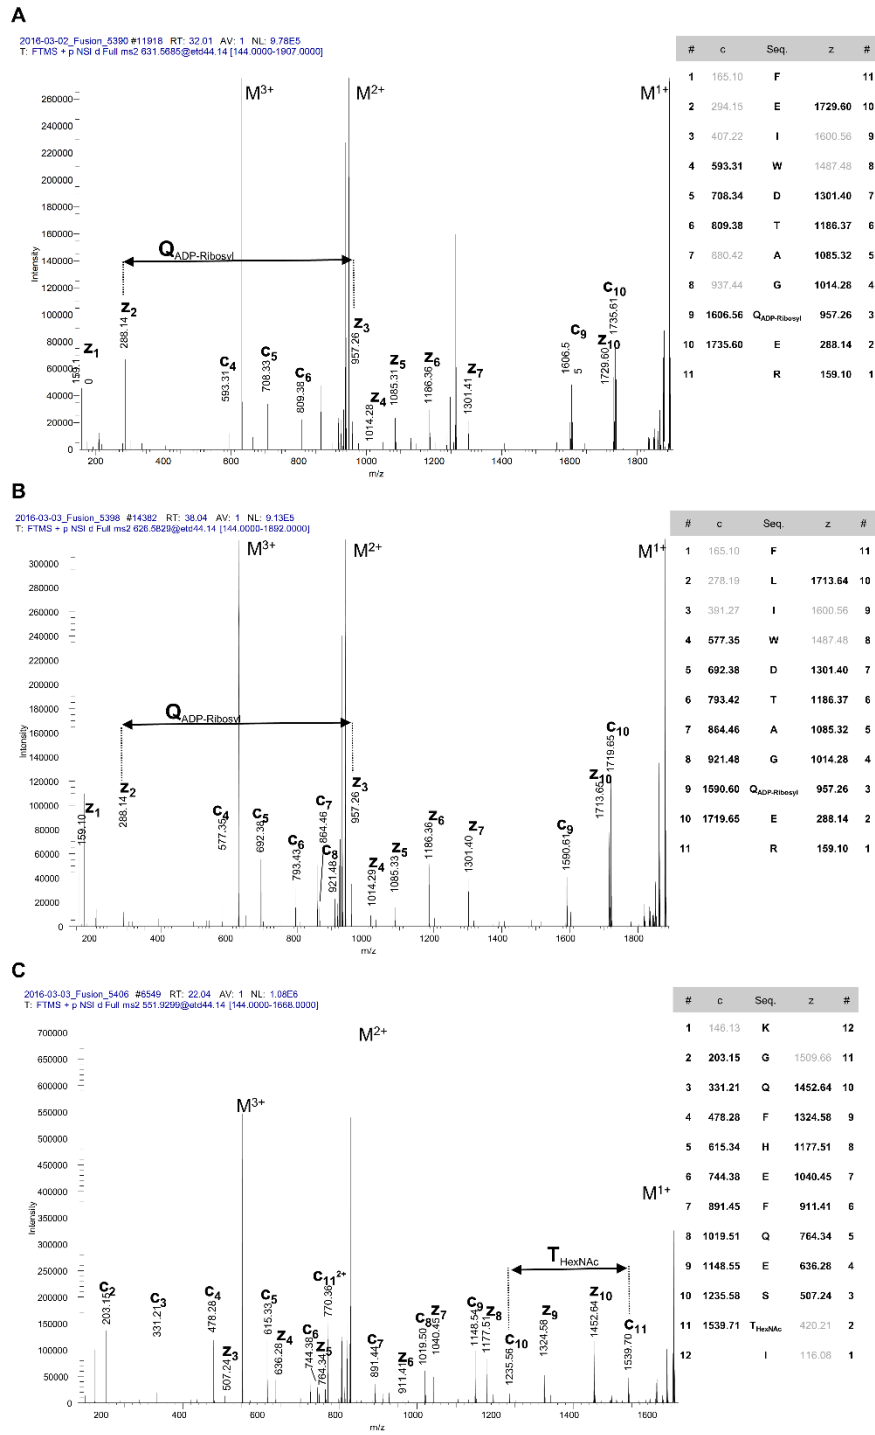

**Fig. S5. ETD MS/MS spectra.** (A) ETD MS/MS spectrum and assigned fragment ions (bold) of the peptide FEIWDTAGQER, ADP-ribosylated at Gln79 of Rab5A. This peptide was identified with a Mascot Score of 39. (B) ETD MS/MS spectrum and assigned fragment ions (bold) of the peptide FLIWDTAGQER, ADP-ribosylated at Gln64 of Rab31. This peptide was identified with a Mascot Score of 66. (C) ETD MS/MS spectrum and assigned fragment ions (bold) of the peptide KGQFHEFQUESTI, HexNAc-modified at Thr52 of Rab5A. This peptide was identified with a Mascot Score of 90.

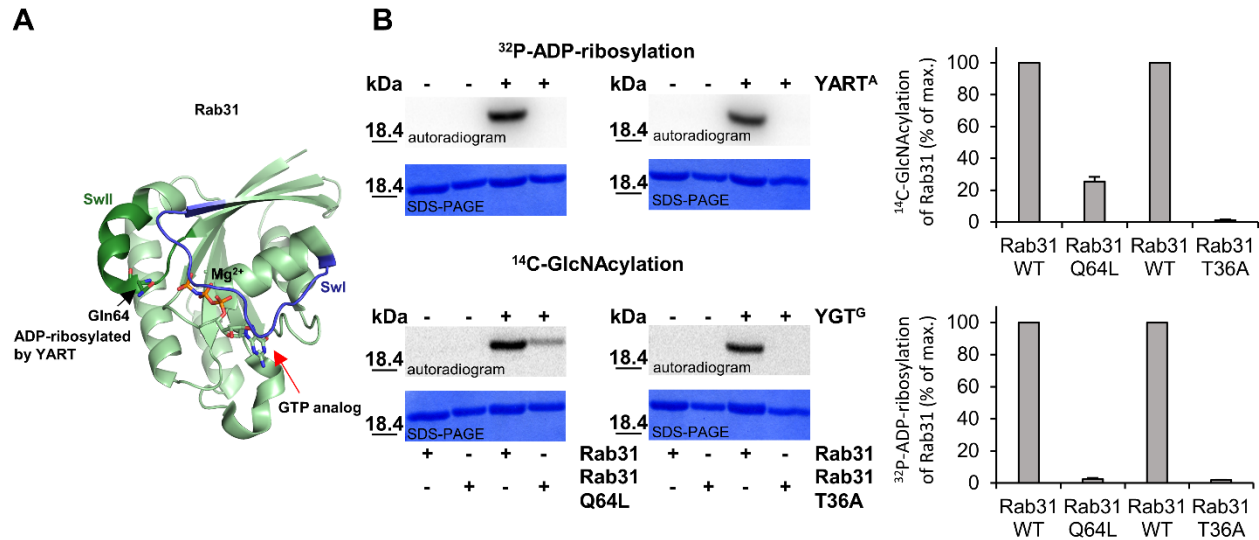

**Fig. S6. YART- and YGT-induced modifications of Rab31.** (A) Localization of the sites of Rab31 that are modified by YART-induced ADP-ribosylation. Modification sites are from MS analyses and introduced into the Rab31 structure (PDB 2FG5). Switch-1 (SwI) and switch-2 regions (SwII) are indicated in blue and dark green, respectively. Light green spheres represent the  $Mg^{2+}$  ion, while the GTP analog is indicated by red arrow. YART ADP-ribosylates Gln64 (black arrow). (B) ADP-ribosylation or GlcNAcylation of mutant Rab31 proteins. Wild-type and mutant Q64L or T36A Rab31 proteins (each 2  $\mu$ g) were incubated with 1  $\mu$ M of YART<sup>A</sup> or YGT<sup>G</sup>, [<sup>32</sup>P]NAD<sup>+</sup> or UDP[<sup>14</sup>C]GlcNAc for 1 h at 21 °C. The modifications of proteins were analyzed by SDS-PAGE and phosphorimaging. The amount of modified Rab proteins was normalized to wild-type Rab protein (100%). Shown are means (+/-SD) of 3 independent experiments and one representative autoradiogram and Coomassie gel.



**Table S1. Data collection and refinement statistics.**

|                                                     | YGT <sup>G</sup><br>(UDP + MnCl <sub>2</sub> )<br>12.8 keV | YGT <sup>G</sup><br>(Apo)<br>12.4 keV         | YGT <sup>G</sup><br>(UDP + MnCl <sub>2</sub> )<br>6.2 keV |
|-----------------------------------------------------|------------------------------------------------------------|-----------------------------------------------|-----------------------------------------------------------|
| <b>Data collection</b>                              |                                                            |                                               |                                                           |
| Wavelength (Å)                                      | 0.9686                                                     | 1.000                                         | 2.000                                                     |
| Space group                                         | P4 <sub>3</sub> 2 <sub>1</sub> 2                           | P2 <sub>1</sub> 2 <sub>1</sub> 2 <sub>1</sub> | P4 <sub>3</sub> 2 <sub>1</sub> 2                          |
| Cell dimensions                                     |                                                            |                                               |                                                           |
| <i>a</i> , <i>b</i> , <i>c</i> (Å)                  | 164.3, 164.3, 47.7                                         | 47.2, 161.7, 163.0                            | 164.5, 164.5, 47.7                                        |
| $\alpha$ , $\beta$ , $\gamma$ (°)                   | 90.0, 90.0, 90.0                                           | 90.0, 90.0, 90.0                              | 90.0, 90.0, 90.0                                          |
| Resolution (Å)                                      | 50-1.9 (2.0-1.9)*                                          | 50-3.4 (3.67-3.4)                             | 50-2.3 (2.4-2.3)                                          |
| <i>R</i> <sub>merge</sub> (%)                       | 18.4 (208.3)                                               | 47.3 (150.8)                                  | 31.5 (139.9)                                              |
| CC(1/2) (%)                                         | 99.6 (52.5)                                                | 96.9 (88.0)                                   | 100.0 (93.7)                                              |
| <i>I</i> / $\sigma$ <i>I</i>                        | 12.07 (1.3)                                                | 7.0 (2.2)                                     | 41.87 (6.23)                                              |
| Completeness (%)                                    | 100 (100)                                                  | 99.7 (99.4)                                   | 97.7 (92.2)                                               |
| Redundancy                                          | 19.4 (19.2)                                                | 13.0 (12.2)                                   | 393.6 (329.4)                                             |
| <b>Refinement</b>                                   |                                                            |                                               |                                                           |
| Resolution (Å)                                      | 45-1.9                                                     | 30-3.4                                        |                                                           |
| No. reflections                                     | 52064                                                      | 17726                                         |                                                           |
| <i>R</i> <sub>work</sub> / <i>R</i> <sub>free</sub> | 18.6/22.3                                                  | 22.7/24.9                                     |                                                           |
| No. atoms                                           |                                                            |                                               |                                                           |
| Protein                                             | 4158                                                       | 7978                                          |                                                           |
| Ligands/ions                                        | 59                                                         | 0                                             |                                                           |
| Water                                               | 408                                                        | 0                                             |                                                           |
| <i>B</i> -factors                                   |                                                            |                                               |                                                           |
| Protein                                             | 52.4                                                       | 46.1                                          |                                                           |
| Ligands/ions                                        | 45.3                                                       | n.a.                                          |                                                           |
| Water                                               | 50.1                                                       | n.a.                                          |                                                           |
| R.m.s. deviations                                   |                                                            |                                               |                                                           |
| Bond lengths (Å)                                    | 0.005                                                      | 0.0085                                        |                                                           |
| Bond angles (°)                                     | 0.65                                                       | 1.03                                          |                                                           |

Each dataset was collected from a single crystal

\*Values in parentheses are for highest-resolution shell.

**Table S2. Proteins structurally homologous to YGT<sup>G</sup> as identified by DALI and showing a Z score higher than 10.**

|    | PDB code | Z-score <sup>a</sup> | Rmsd (Å) | Lali | Nres | Identity (%) | Description                               | Organism                        |
|----|----------|----------------------|----------|------|------|--------------|-------------------------------------------|---------------------------------|
| 1  | 2vkd     | 33.9                 | 3.3      | 396  | 542  | 21           | Catalytic domain of lethal toxin          | <i>Clostridium sordellii</i>    |
| 2  | 2bvl     | 33.7                 | 3.2      | 397  | 543  | 21           | Catalytic domain of toxin B (TcdB)        | <i>Clostridium difficile</i>    |
| 3  | 4r04     | 32.1                 | 4.0      | 419  | 1793 | 22           | Catalytic domain of toxin A (TcdA)        | <i>Clostridium difficile</i>    |
| 4  | 2vk9     | 26.9                 | 3.2      | 391  | 540  | 20           | Catalytic domain of the alpha toxin       | <i>Clostridium novyi</i>        |
| 5  | 4mix     | 18.4                 | 2.8      | 196  | 277  | 23           | Glycosyltransferase domain of PaTox toxin | <i>Photorhabdus asymbiotica</i> |
| 6  | 2wzf     | 15.5                 | 3.0      | 213  | 515  | 14           | LpGT (Lgt1) glycosyltransferase           | <i>Legionella pneumophila</i>   |
| 7  | 3jsz     | 15.1                 | 3.3      | 218  | 520  | 13           | LpGT (Lgt1) glycosyltransferase           | <i>Legionella pneumophila</i>   |
| 8  | 5h60     | 12.7                 | 3.0      | 191  | 304  | 14           | Salmonella effector SseK1                 | <i>Salmonella typhimurium</i>   |
| 9  | 6dus     | 12.4                 | 3.1      | 190  | 310  | 14           | Salmonella effector SseK3                 | <i>Salmonella typhimurium</i>   |
| 10 | 5h5y     | 12.0                 | 3.0      | 180  | 286  | 13           | Non-LEE encoded effector protein NleB     | <i>Salmonella typhimurium</i>   |

Abbreviation: Z-score, statistical significance of the similarity between YGT<sup>G</sup> and structurally related proteins; RMSD, root mean square deviation of C atoms given in Ångstroms; Lali, number of structurally equivalent residues; Nres, corresponds to the total number of amino acid residues in the hit protein; % identity, corresponds to the percentage of identical over structurally equivalent amino acid residues

The search was performed using the PDB90 database to avoid multiple occurrences of the same protein.

**Table S3. Genomic DNA, primer, gblocks, plasmids, and vectors.**

| <b>genomic DNA</b>                                |                                                            |                                                                                           |                        |
|---------------------------------------------------|------------------------------------------------------------|-------------------------------------------------------------------------------------------|------------------------|
| <i>Yersinia mollaretii</i> ATCC 43969             |                                                            |                                                                                           |                        |
| <b>primer</b>                                     |                                                            |                                                                                           |                        |
| <b>Name</b>                                       | <b>Sequence (5→3)</b>                                      |                                                                                           |                        |
| YART <sup>FL</sup> fw                             | CCGAAGACGGAGGTATGAAAAAGAATAGAATTAATTCATTTAATGTTGATAACTACCC |                                                                                           |                        |
| YART <sup>FL</sup> rv                             | CTACTCGAGTTAGTTGCTGACCCAGCCTCCTGTTTAATC                    |                                                                                           |                        |
| YART <sup>A</sup> for <i>E. coli</i> optimized fw | CTTGATCCTTAAAAAAAACCGCATTAAACAGCTTC                        |                                                                                           |                        |
| YART <sup>A</sup> for <i>E. coli</i> optimized rv | CTTAAGCTTTCACAGTACGCGCAATTTTTTCGTGTTTTTTTC                 |                                                                                           |                        |
| YART <sup>1-632</sup> fw                          | CCCAGAATTCATGAAAAAGAATAGAATTAATTCATTTAATGTTGATAACTACCC     |                                                                                           |                        |
| YART <sup>1-632</sup> rv                          | CCTCTCGAGTTGACTCACCTGACGGTGCATTTCTTCC                      |                                                                                           |                        |
| YART <sup>A</sup> for pESC-Ura fw                 | CTGGATCCATGTTAAAAAAAACCGCATTAAACAGCTTC                     |                                                                                           |                        |
| YART <sup>A</sup> for pESC-Ura rv                 | GAGTCGACCGATTCCCACACACTAAAATCAATAG                         |                                                                                           |                        |
| YGT <sup>FL</sup> fw                              | CAGAAGACGGAGGTATGAGCACTGATCTACCTAAATCGAACAAAAAC            |                                                                                           |                        |
| YGT <sup>FL</sup> rv                              | CCGTCGACTTAAACTACGCTTTTATGCGACAGCACCTCATAACTATCCC          |                                                                                           |                        |
| YGT <sup>G</sup> fw                               | CCATGG GCACTGATCTACCTAAATCG                                |                                                                                           |                        |
| YGT <sup>G</sup> rv                               | GCGGCCGC ATCTGCCAGTGTGCAAGC                                |                                                                                           |                        |
| YGT <sup>G</sup> for pESC-Ura fw                  | ATGGATCCAGCACTGATCTACCTAAATCG                              |                                                                                           |                        |
| YGT <sup>G</sup> for pESC-Ura rv                  | GACTCGAGTCACAACCTGACCATAGGATTTTCATAG                       |                                                                                           |                        |
| quick change (QC) YART E160A fw                   | CATAAAGGGCAAAAAGCGATATCTGTTATCAAGG                         |                                                                                           |                        |
| QC YART <sup>A</sup> E160A (gBlock *3) fw         | GAAACACAAGGGACAAAAAGCAATTAGCGTGATAAAGGAG                   |                                                                                           |                        |
| QC YART <sup>A</sup> E160A (gBlock *1) fw         | ACATAAAGGGACAGAAAAGCAATTAGCGTTATTAAG                       |                                                                                           |                        |
| QC YGT <sup>G</sup> D211/213A (gBlock *2) fw      | GGTGTACATTGCCACGGCCCTTCTCCCCACAT                           |                                                                                           |                        |
| QC YGT D211/213A fw                               | GGGTGTCTATATTGCTACAGCTTTGCTTCCACACATC                      |                                                                                           |                        |
| QC YART C500A fw                                  | CGCTCAATCTCACC GGAGCTTCATTACTTAACCCG                       |                                                                                           |                        |
| QC YGT C668A fw                                   | CTGAATATGGCGGGCGCTTCGTTATTCGATACC                          |                                                                                           |                        |
| QC YGT L781A fw                                   | GAAATCCTATGGTCAGGCGGGCACACTATCACAAC                        |                                                                                           |                        |
| QC Rab5A T52A fw                                  | CATGAATTTCAAGAGAGTGCCATAGGGGCTGCTTTTCTAA                   |                                                                                           |                        |
| QC Rab5A Q79L fw                                  | TATGGGATACAGCTGGTCTAGAACGATACCATAGCTTAGC                   |                                                                                           |                        |
| QC Rab31 T36A fw                                  | GACCACAACATCAGCCCTGCTATTGGGGCATCTTTTATG                    |                                                                                           |                        |
| QC Rab31 Q64L fw                                  | CATCTGGGACACTGCTGGTCTAGAACGGTTTCATTTCATTGGC                |                                                                                           |                        |
| <b>gblocks</b>                                    |                                                            |                                                                                           |                        |
| <b>Number</b>                                     | <b>gblock</b>                                              | <b>Comment</b>                                                                            | <b>Amino acid seq.</b> |
| *1                                                | YART <sup>A</sup>                                          | Codon optimized for <i>E. coli</i>                                                        | <i>Y. mollaretii</i>   |
| *2                                                | YGT <sup>G</sup>                                           | Codon optimized for <i>H. sapiens</i> ; kozak sequence N-terminal, 3x FLAG-tag C-terminal | <i>Y. mollaretii</i>   |
| *3                                                | YART <sup>A</sup>                                          | Codon optimized for <i>H. sapiens</i> ; kozak sequence N-terminal, 3x FLAG-tag C-terminal | <i>Y. mollaretii</i>   |
| *4                                                | RabGAP-5                                                   | Codon optimized for <i>E. coli</i>                                                        | <i>H. sapiens</i>      |
| *5                                                | R5BD-EEA1                                                  |                                                                                           | <i>H. sapiens</i>      |
| *6                                                | R5BD-Rabenosyn-5                                           |                                                                                           | <i>H. sapiens</i>      |
| *7                                                | Rab5B                                                      | Codon optimized for <i>E. coli</i>                                                        | <i>H. sapiens</i>      |
| *8                                                | Rab5C                                                      | Codon optimized for <i>E. coli</i>                                                        | <i>H. sapiens</i>      |
| *9                                                | Rab17                                                      | Codon optimized for <i>E. coli</i>                                                        | <i>H. sapiens</i>      |
| *10                                               | Rab20                                                      | Codon optimized for <i>E. coli</i>                                                        | <i>H. sapiens</i>      |
| *11                                               | Rab21                                                      | Codon optimized for <i>E. coli</i>                                                        | <i>H. sapiens</i>      |

| *12                         | Rab23          | Codon optimized for <i>E. coli</i>           | <i>H. sapiens</i>    |                                        |
|-----------------------------|----------------|----------------------------------------------|----------------------|----------------------------------------|
| *13                         | Rab24          | Codon optimized for <i>E. coli</i>           | <i>H. sapiens</i>    |                                        |
| *14                         | Rab26          | Codon optimized for <i>E. coli</i>           | <i>H. sapiens</i>    |                                        |
| *15                         | Rab6A          | Codon optimized for <i>E. coli</i>           | <i>H. sapiens</i>    |                                        |
| <b>plasmids and vectors</b> |                |                                              |                      |                                        |
| <b>Number</b>               | <b>Plasmid</b> | <b>Insert</b>                                | <b>Mutant</b>        | <b>Comment/ gblock no.</b>             |
| #1                          | pE-SUMOstar    | YART <sup>1-1797</sup> (YART <sup>FL</sup> ) | L917K                | WP_004874725.1 (NCBI ref.-seq.)        |
| #2                          |                | YGT <sup>1-1998</sup> (YGT <sup>FL</sup> )   | L781A; C668A; L1029K | WP_004876989.1 (NCBI ref.-seq.)        |
| #3                          | pET28a         | YGT <sup>1-520</sup> (YGT <sup>G</sup> )     | D211/213A            |                                        |
| #4                          |                | YGT <sup>1-780</sup>                         |                      |                                        |
| #5                          |                | YART <sup>1-630</sup>                        | C500A                |                                        |
| #6                          | pColdII        | YART <sup>1-349</sup> (YART <sup>A</sup> )   | E160A                | *1; 7; 8; 9; 10; 12; 14; 15            |
| #7                          |                | Rab5B                                        |                      |                                        |
| #8                          |                | Rab5C                                        |                      |                                        |
| #9                          |                | Rab6A                                        |                      |                                        |
| #10                         |                | Rab17                                        |                      |                                        |
| #11                         |                | Rab20                                        |                      |                                        |
| #12                         |                | Rab23                                        |                      |                                        |
| #13                         |                | Rab26                                        |                      |                                        |
| #14                         | pET28a         | Rab5A                                        | Q79L; T52A           | AS-seq.: <i>Canis lupus familiaris</i> |
| #15                         |                | Rab21                                        |                      | *11; 13;                               |
| #16                         |                | Rab24                                        |                      |                                        |
| #17                         |                | Rab1A                                        |                      | AS-seq.: <i>H. sapiens</i>             |
| #18                         |                | Rab31                                        | Q64L; T36A           |                                        |
| #19                         | pGEX4-T3       | Rab7                                         |                      |                                        |
| #20                         |                | Rab10                                        |                      |                                        |
| #21                         |                | H-Ras                                        |                      |                                        |
| #22                         |                | RhoA                                         |                      |                                        |
| #23                         |                | Rac1                                         |                      |                                        |
| #24                         |                | Cdc42                                        |                      |                                        |
| #25                         | pMAL-C2        | RabGAP-5                                     |                      | *4; 5; 6                               |
| #26                         | pGEX4-T2       | EEA1: R5BD <sup>1-209</sup>                  |                      |                                        |
| #27                         |                | Rabenosyn-5: R5BD <sup>1-40</sup>            |                      |                                        |
| #28                         | pEGFP-C1       | YGT <sup>G</sup>                             | D211/213A            | *2; 3                                  |
| #29                         |                | YART <sup>A</sup>                            | E160A                |                                        |
| #30                         | pmCherry-C1    | Rab5A                                        |                      | AS-seq.: <i>Canis lupus familiaris</i> |
| #31                         | pcDNA5/FRT/TO  | FLAG-Rab5A                                   |                      | Addgene plasmid #28043                 |
| #32                         | pESC-Ura       | YGT <sup>G</sup>                             | D211/213A            |                                        |
| #33                         |                | YART <sup>A</sup>                            | E160A                |                                        |

**Table S4. Buffer and conditions of protein purification.**

| PN  | AR  | IC ( $\mu$ M) | ET ( $^{\circ}$ C) | ED  | T                                  | LB | WB1            | WB2                       | EB                        | SB  |
|-----|-----|---------------|--------------------|-----|------------------------------------|----|----------------|---------------------------|---------------------------|-----|
| #1  | amp | 50            | 10                 | ON  | His,<br>SUMO                       | B1 |                |                           | WB1 +<br>500 mM imidazole | B6  |
| #2  |     |               |                    |     |                                    |    |                |                           |                           |     |
| #3  | kan | 1000          | 23                 |     | His                                | B2 |                |                           | WB1 +<br>500 mM imidazole |     |
| #6  | amp | 45            | 10                 |     |                                    |    |                |                           |                           |     |
| #4  | kan | 300           | 23                 |     | B1                                 |    |                |                           | WB1 +<br>500 mM imidazole |     |
| #5  |     | 300           | 20                 |     |                                    |    |                |                           |                           |     |
| #7  | amp | 100           | 29                 |     | WB1 +<br>5 mM<br>MgCl <sub>2</sub> | B3 | WB1;<br>pH 8.0 | WB2 +<br>500 mM imidazole |                           |     |
| #8  |     |               |                    |     |                                    |    |                |                           |                           |     |
| #9  |     |               |                    |     |                                    |    |                |                           |                           |     |
| #10 |     |               |                    |     |                                    |    |                |                           |                           |     |
| #11 |     |               |                    |     |                                    |    |                |                           |                           |     |
| #12 |     |               |                    |     |                                    |    |                |                           |                           |     |
| #13 |     |               |                    |     |                                    |    |                |                           |                           |     |
| #14 |     |               |                    |     |                                    |    |                |                           |                           |     |
| #15 |     |               |                    |     |                                    |    |                |                           |                           |     |
| #16 |     |               |                    |     |                                    |    |                |                           |                           |     |
| #17 |     |               |                    |     |                                    |    |                |                           |                           |     |
| #18 |     |               |                    |     |                                    |    |                |                           |                           |     |
| #19 |     |               |                    |     |                                    |    |                |                           | amp                       |     |
| #20 |     |               |                    |     |                                    |    |                |                           |                           |     |
| #21 |     |               |                    |     |                                    |    |                |                           |                           |     |
| #22 |     |               |                    |     |                                    |    |                |                           |                           |     |
| #23 |     |               |                    |     |                                    |    |                |                           |                           |     |
| #24 |     |               |                    |     |                                    |    |                |                           |                           |     |
| #25 |     | 300           | 37                 | 2 h | MBP                                | B4 |                | WB1;<br>pH 7.4            | WB2 +<br>10 mM maltose    |     |
| #26 |     | 500           | 37                 | 4 h | GST                                | B5 |                | PBS                       |                           | PBS |
| #27 |     |               |                    |     |                                    |    |                |                           |                           |     |

Abbreviation: PN, plasmid number; AR, antibiotic resistance; IC, IPTG concentration; ET, expression temperature; ED expression duration; T, tag; LB, lysis buffer; WB, washing buffer; EB, elution buffer; SB, storage buffer; amp, ampicillin; kan, kanamycin; ON, overnight; MBP, maltose-binding protein; GST, glutathione S-transferase; B, buffer

B1: 300 mM NaCl; 20 mM Tris-HCl; 20 mM imidazole; 10 % glycerol; pH 8.0

B2: 150 mM KCl; 50 mM Tris-HCl; 20 mM imidazole; 3 mM  $\beta$ -ME-EtOH; pH 7.4

B3: 300 mM NaCl; 20 mM Tris-HCl; pH 7.4

B4: 200 mM NaCl; 20 mM Tris-HCl; 1 mM EDTA; pH 8.0

B5: PBS + 0.1 % Triton x100

B6: PBS + 10 % glycerol
